# Supplementary material
Source: PubMed Central journal article supplement (PMC10355916)
Supplement: 12672_2018_324_MOESM1_ESM.pdf [file 12672_2018_324_MOESM1_ESM.pdf]

# **Thyroid hormone promotes $\beta$ -catenin activation and cell proliferation in colorectal cancer**

**Yee-Shin Lee<sup>1</sup>, Yu-Tang Chin<sup>2,3</sup>, Ya-Jung Shih<sup>2,3</sup>, André Wendindondé Nana<sup>1</sup>, Yi-Ru Chen<sup>2,3</sup>, Han-Chung Wu<sup>4</sup>, Yu-Chen SH Yang<sup>5</sup>, Hung-Yun Lin<sup>2,3\*</sup>, and Paul J. Davis<sup>6,7</sup>**

<sup>1</sup>Ph.D. Program for Cancer Biology and Drug Discovery, College of Medical Science and Technology, Taipei Medical University and Academia Sinica, Taipei, Taiwan

<sup>2</sup>Ph.D. Program for Cancer Biology and Drug Discovery, College of Medical Science and Technology, Taipei Medical University, Taipei, Taiwan

<sup>3</sup>Taipei Cancer Center, Taipei Medical University, Taipei, Taiwan

<sup>4</sup>Institute of Cellular and Organismic Biology, Academia Sinica, Taipei, Taiwan

<sup>5</sup>Joint Biobank, Office of Human Research, Taipei Medical University, Taipei, Taiwan

<sup>6</sup>Pharmaceutical Research Institute, Albany College of Pharmacy and Health Sciences, Albany, NY, USA

<sup>7</sup>Albany Medical College, Albany, NY, USA

\*Corresponding Author

E-mail: linhy@tmu.edu.tw

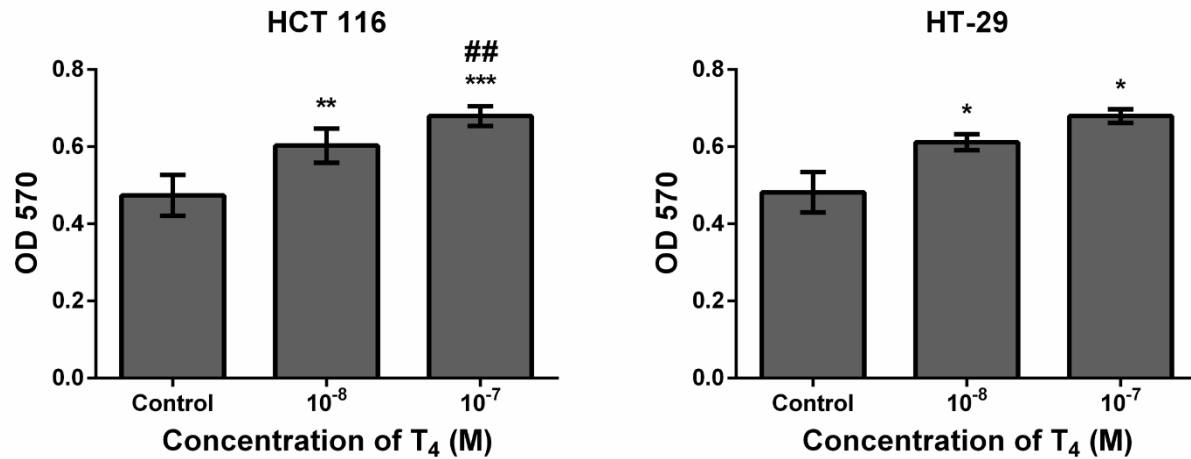

**Supplementary Fig. 1**

**Thyroid hormone T<sub>4</sub> promotes cell proliferation in colorectal cancer cell lines HCT 116 and HT-29.** Cells treated with/without T<sub>4</sub> were evaluated after 48 hr using MTT assay, with absorbance at 570 nm. Data represent at least three independent experiments performed in replicates and are presented as mean  $\pm$  sd (HCT 116 n=5; HT-29 n=3). \* $P \leq 0.05$ , \*\* $P \leq 0.01$  and \*\*\* $P \leq 0.001$  compared to the control group. ## $P \leq 0.01$  compared to the T<sub>4</sub> (10<sup>-8</sup> M) group

## **Supplementary Materials and Methods**

### **3-(4,5-Dimethylthiazol-2-yl)-2,5-diphenyltetrazolium Bromide (MTT)**

#### **Assay**

The human colorectal cancer cell lines were seeded onto 96-well plates ( $10^3$  cells per well). After the indicated time periods, the treated cells were incubated with fresh medium containing 1 mg/ml of MTT (Sigma-Aldrich, St. Louis, MO, USA) at 37 °C for 4 hr. Resulting formazan crystals were dissolved in dimethyl sulfoxide and plates were read using VersaMax ELISA Microplate Reader (Molecular Devices, Sunnyvale, CA, USA) with absorbance at 570 nm.
